# Supplementary material for: Accuracy of the Patient Health Questionnaire-9 for screening to detect major depression: updated systematic review and individual participant data meta-analysis
Source: PubMed Central journal article supplement — BMJ. 2021 Oct 5;375:n2183. doi: 10.1136/bmj.n2183 (PMC8491108; doi:10.1136/bmj.n2183), 2021-10-05
Supplement: negz065099.ww2.pdf [file negz065099.ww2.pdf]

#### Depression Screening Data (DEPRESSD) PHQ Group:

Mahrukh Imran, Lady Davis Institute for Medical Research, Jewish General Hospital, Montréal, QC, Canada; Danielle B Rice, Lady Davis Institute for Medical Research, Jewish General Hospital, Montréal, QC, Canada; Kira E Riehm, Lady Davis Institute for Medical Research, Jewish General Hospital, Montréal, QC, Canada; Marleine Azar, Lady Davis Institute for Medical Research, Jewish General Hospital, Montréal, QC, Canada; Alexander W Levis, Lady Davis Institute for Medical Research, Jewish General Hospital, Montréal, QC, Canada; Jill T Boruff, Schulich Library of Physical Sciences, Life Sciences, and Engineering, McGill University, Montréal, QC, Canada; Pim Cuijpers, Department of Clinical, Neuro and Developmental Psychology, Amsterdam Public Health Research Institute, Vrije Universiteit Amsterdam, Netherlands; Simon Gilbody, Hull York Medical School and Department of Health Sciences, University of York, Heslington, York, UK; John P A Ioannidis, Department of Medicine, Department of Epidemiology and Population Health, Department of Biomedical Data Science, Department of Statistics, Stanford University, Stanford, CA, USA; Lorie A Kloda, Library, Concordia University, Montréal, QC, Canada; Scott B Patten, Department of Community Health Sciences, University of Calgary, Calgary, AB, Canada; Ian Shrier, Lady Davis Institute for Medical Research, Jewish General Hospital, Montréal, QC, Canada; Roy C Ziegelstein, Department of Medicine, Johns Hopkins University School of Medicine, Baltimore, MD, USA; Sarah Markham, Department of Biostatistics and Health Informatics, King's College London, London, UK; Sultan H Alamri, Faculty of Medicine, King Abdulaziz University, Jeddah, Saudi Arabia; Dagmar Amtmann, Department of Rehabilitation Medicine, University of Washington, Seattle, WA, USA; Bruce Arroll, Department of General Practice and Primary Health Care, University of Auckland, New Zealand; Liat Ayalon, Louis and Gabi Weisfeld School of Social Work, Bar Ilan University, Ramat Gan, Israel; Hamid R Baradaran, Endocrine Research Centre, Institute of Endocrinology and Metabolism, Iran University of Medical Sciences, Tehran, Iran; Anna Beraldi, Kbo-Lech-Mangfall-Klinik Garmisch-Partenkirchen, Klinik für Psychiatrie, Psychotherapie und Psychosomatik, Lehrkrankenhaus der Technischen Universität München, Munich, Germany; Charles N Bernstein, University of Manitoba IBD Clinical and Research Centre, Winnipeg, MB, Canada; Arvin Bhana, Centre for Rural Health, School of Nursing and Public Health, College of Health Sciences, University of KwaZulu-Natal, South Africa; Charles H Bombardier, Department of Rehabilitation Medicine, University of Washington, Seattle, WA, USA; Ryna Imma Buji, Department of Psychiatry, Hospital Mesra Bukit Padang, Sabah, Malaysia; Peter Butterworth, Centre for Research on Ageing, Health and Wellbeing, Research School of Population Health, Australian National University, Canberra, ACT, Australia; Gregory Carter, Centre for Brain and Mental Health Research, University of Newcastle, NSW, Australia; Marcos H Chagas, Department of Neurosciences and Behaviour, Ribeirão Preto Medical School, University of São Paulo, Ribeirão Preto, Brazil; Juliana C N Chan, Department of Medicine and Therapeutics, Hong Kong Institute of Diabetes and Obesity and Li Ka Shing Institute of Health Science, Chinese University of Hong Kong, Prince of Wales Hospital, Shatin, Hong Kong SAR, China; Lai Fong Chan, Department of Psychiatry, National University of Malaysia, Kuala Lumpur, Malaysia; Dixon Chibanda, Department of Community Medicine, University of Zimbabwe, Harare, Zimbabwe; Kerrie Clover, Centre for Brain and Mental Health Research, University of Newcastle, NSW, Australia; Aaron Conway, Lawrence S Bloomberg Faculty of Nursing, University of Toronto, Toronto, ON, Canada; Yeates Conwell, Department of Psychiatry, University of Rochester Medical Center, Rochester, NY, USA; Federico M Daray, Institute of

Pharmacology, School of Medicine, University of Buenos Aires, Argentina; Janneke M de Man-van Ginkel, Julius Centre for Health Sciences and Primary Care, Department of Nursing Science, University Medical Center Utrecht – University Utrecht, Utrecht, Netherlands; Jaime Delgado, Clinical Psychology Unit, Department of Psychology, University of Sheffield, Sheffield, UK; Crisanto Diez-Quevedo, Servei de Psiquiatria, Hospital Germans Trias i Pujol, Badalona, Spain; Jesse R Fann, Department of Psychiatry and Behavioural Sciences, University of Washington, Seattle, WA, USA; Felix H Fischer, Department of Psychosomatic Medicine, Centre for Internal Medicine and Dermatology, Charité - Universitätsmedizin Berlin, Germany; Sally Field, Perinatal Mental Health Project, Alan J Flisher Centre for Public Mental Health, Cape Town, South Africa; Jane R W Fisher, Global and Women's Health, Public Health and Preventive Medicine, Monash University, Melbourne, VIC, Australia; Daniel Fung, Department of Developmental Psychiatry, Institute of Mental Health, Singapore; Emily C Garman, Alan J Flisher Centre for Public Mental Health, Department of Psychiatry and Mental Health, University of Cape Town, Cape Town, South Africa; Bizu Gelaye, Department of Epidemiology, Harvard T H Chan School of Public Health, Boston, MA, USA; Leila Gholizadeh, Faculty of Health, University of Technology Sydney, Sydney, Australia; Lorna J Gibson, Tropical Epidemiology Group, Faculty of Epidemiology and Population Health, London School of Hygiene and Tropical Medicine, London, UK; Felicity Goodyear-Smith, Department of General Practice and Primary Health Care, University of Auckland, New Zealand; Eric P Green, Duke Global Health Institute, Duke University, Durham, NC, USA; Catherine G Greeno, School of Social Work, University of Pittsburgh, Pittsburgh, PA, USA; Brian J Hall, New York University Shanghai, Shanghai, People's Republic of China; Liisa Hantsoo, Department of Psychiatry and Behavioural Sciences, Johns Hopkins University School of Medicine, Baltimore, MD, USA; Emily E Haroz, Center For American Indian Health, Department of International Health, Johns Hopkins Bloomberg School of Public Health, Baltimore, MD, USA; Martin Härter, Department of Medical Psychology, University Medical Centre Hamburg-Eppendorf, Hamburg, Germany; Ulrich Hegerl, Department of Psychiatry, Psychosomatics and Psychotherapy, Goethe-Universität Frankfurt, Germany; Leanne Hides, School of Psychology, University of Queensland, Brisbane, QLD, Australia; Stevan E Hobfoll, STAR-Stress, Anxiety and Resilience Consultants, Chicago, IL, USA; Simone Honikman, Perinatal Mental Health Project, Alan J Flisher Centre for Public Mental Health, Department of Psychiatry and Mental Health, University of Cape Town, Cape Town, South Africa; Marie Hudson, Lady Davis Institute for Medical Research, Jewish General Hospital, Montréal, QC, Canada; Thomas Hyphantis, Department of Psychiatry, Faculty of Medicine, School of Health Sciences, University of Ioannina, Greece; Masatoshi Inagaki, Department of Psychiatry, Faculty of Medicine, Shimane University, Shimane, Japan; Hong Jin Jeon, Department of Psychiatry, Depression Centre, Samsung Medical Centre, Sungkyunkwan University School of Medicine, Seoul, South Korea; Nathalie Jetté, Department of Neurology, Icahn School of Medicine at Mount Sinai, New York, NY, USA; Mohammad E Khamseh, Endocrine Research Centre, Institute of Endocrinology and Metabolism, Iran University of Medical Sciences, Tehran, Iran; Sebastian Köhler, Department of Psychiatry and Neuropsychology, Maastricht University, Maastricht, Netherlands; Brandon A Kohrt, Department of Psychiatry and Behavioural Sciences, The George Washington University, Washington, DC, USA; Yunxin Kwan, Department of Psychological Medicine, Tan Tock Seng Hospital, Singapore; Femke Lamers, Department of Psychiatry, Amsterdam Public Health Research Institute, Amsterdam UMC, Vrije Universiteit, Amsterdam, Netherlands; Maria Asunción Lara, Instituto Nacional de Psiquiatría Ramón de la Fuente Muñiz San Lorenzo Huipulco,

Tlalpan, México D F Mexico; Holly F Levin-Aspenson, Department of Psychology, University of Notre Dame, Notre Dame, IN, USA; Shen-Ing Liu, Programme in Health Services and Systems Research, Duke-NUS Medical School, Singapore; Manote Lotrakul, Department of Psychiatry, Faculty of Medicine, Ramathibodi Hospital, Mahidol University, Bangkok, Thailand; Sonia R Loureiro, Department of Neurosciences and Behaviour, Ribeirão Preto Medical School, University of São Paulo, Ribeirão Preto, Brazil; Bernd Löwe, Department of Psychosomatic Medicine and Psychotherapy, University Medical Center Hamburg-Eppendorf, Hamburg, Germany; Nagendra P Luitel, Research Department, TPO Nepal, Kathmandu, Nepal; Crick Lund, Alan J Flisher Centre for Public Mental Health, Department of Psychiatry and Mental Health, University of Cape Town, Cape Town, South Africa; Ruth Ann Marrie, Departments of Medicine and Community Health Sciences, Max Rady College of Medicine, Rady Faculty of Health Sciences, University of Manitoba, Winnipeg, MB, Canada; Laura Marsh, Baylor College of Medicine, Houston and Michael E DeBakey Veterans Affairs Medical Center, Houston, TX, USA; Brian P Marx, National Center for PTSD at VA Boston Healthcare System, Boston, MA, USA; Anthony McGuire, Department of Nursing, St Joseph's College, Standish, ME, USA; Sherina Mohd Sidik, Department of Psychiatry, Faculty of Medicine and Health Sciences, Universiti Putra Malaysia, Serdang, Selangor, Malaysia; Tiago N Munhoz, Post-graduate Programme in Epidemiology, Federal University of Pelotas, Pelotas, RS, Brazil; Kumiko Muramatsu, Department of Clinical Psychology, Graduate School of Niigata Seiryō University, Niigata, Japan; Juliet E M Nakku, Butabika National Referral Teaching Hospital, Kampala, Uganda; Laura Navarrete, Department of Epidemiology and Psychosocial Research, Instituto Nacional de Psiquiatría Ramón de la Fuente Muñiz, Ciudad de México, México; Flávia L Osório, Department of Neurosciences and Behaviour, Ribeirão Preto Medical School, University of São Paulo, Ribeirão Preto, Brazil; Brian W Pence, Department of Epidemiology, Gillings School of Global Public Health, University of North Carolina at Chapel Hill, Chapel Hill, NC, USA; Philippe Persoons, Department of Psycho-Pedagogic Psychiatry, Healthcare Group Sint-Kamillus, Broeders van Liefde, Bierbeek, Belgium; Inge Petersen, Centre for Rural Health, School of Nursing and Public Health, University of KwaZulu-Natal, South Africa; Angelo Picardi, Centre for Behavioural Sciences and Mental Health, Italian National Institute of Health, Rome, Italy; Stephanie L Pugh, NRG Oncology Statistics and Data Management Center, Philadelphia, PA, USA; Terence J Quinn, Institute of Cardiovascular and Medical Sciences, University of Glasgow, Glasgow, UK; Elmars Rancans, Department of Psychiatry and Narcology, Riga Stradins University, Latvia; Sujit D Rathod, Department of Population Health, London School of Hygiene and Tropical Medicine, London, UK; Katrin Reuter, Group Practice for Psychotherapy and Psycho-oncology, Freiburg, Germany; Alasdair G Rooney, Division of Psychiatry, Royal Edinburgh Hospital, University of Edinburgh, Edinburgh, UK; Heather J Rowe, School of Public Health and Preventive Medicine, Monash University, Melbourne, VIC, Australia; Iná S Santos, Post-graduate Programme in Epidemiology, Federal University of Pelotas, Pelotas, RS, Brazil; Miranda T Schram, Department of Internal Medicine, Maastricht University Medical Center, Maastricht, Netherlands; Juwita Shaaban, Department of Family Medicine, School of Medical Sciences, Universiti Sains Malaysia, Kelantan, Malaysia; Eileen H Shinn, Department of Behavioural Science, University of Texas M D Anderson Cancer Center, Houston, TX, USA; Abbey Sidebottom, Allina Health, Minneapolis, MN, USA; Adam Simning, Department of Psychiatry, University of Rochester Medical Center, Rochester, NY, USA; Lena Spangenberg, Department of Medical Psychology and Medical Sociology, University of Leipzig, Germany; Lesley Stafford, Centre for Women's Mental Health, Royal

Women's Hospital, Parkville, Australia; Sharon C Sung, Programme in Health Services and Systems Research, Duke-NUS Medical School, Singapore; Keiko Suzuki, Department of General Medicine, Asahikawa University Hospital, Asahikawa, Hokkaido, Japan; Pei Lin Lynnette Tan, Department of Psychological Medicine, Tan Tock Seng Hospital, Singapore; Martin Taylor-Rowan, Institute of Cardiovascular and Medical Science, University of Glasgow, Glasgow, UK; Thach D Tran, Global and Women's Health, Public Health and Preventive Medicine, Monash University, Melbourne, VIC, Australia; Alyna Turner, School of Medicine and Public Health, University of Newcastle, Newcastle, NSW, Australia; Christina M van der Feltz-Cornelis, Department of Health Sciences, HYMS, University of York, York, UK; Thandi van Heyningen, Division of Epidemiology and Biostatistics, School of Public Health and Family Medicine, Faculty of Health Sciences, University of Cape Town, Cape Town, South Africa; Henk C van Weert, Department General Practice, Institute Public Health, Amsterdam Universities Medical Centres, Amsterdam, Netherlands; Paul A Vöhringer, Department of Psychiatry and Mental Health, Clinical Hospital, Universidad de Chile, Santiago, Chile; Lynne I Wagner, Department of Social Sciences and Health Policy, Wake Forest School of Medicine, Wake Forest University, Winston-Salem, NC, USA; Jian Li Wang, University of Ottawa Institute of Mental Health Research, Ottawa, ON, Canada; Wenzheng Wang, Shanghai Mental Health Center, Shanghai Jiao Tong University School of Medicine, Shanghai, China; David Watson, Department of Psychology, University of Notre Dame, Notre Dame, IN, USA; Jennifer White, Department of Physiotherapy, School of Primary and Allied Health Care, Monash University, Melbourne, VIC, Australia; Mary A Whooley, Departments of Medicine and of Epidemiology and Biostatistics, University of California San Francisco, San Francisco, CA, USA; Kirsty Winkley, Florence Nightingale Faculty of Nursing, Midwifery and Palliative Care, King's College London, London, UK; Karen Wynter, School of Nursing and Midwifery, Deakin University, Melbourne, VIC, Australia; Mitsuhiko Yamada, Department of Neuropsychopharmacology, National Institute of Mental Health, National Centre of Neurology and Psychiatry, Ogawa-Higashi, Kodaira, Tokyo, Japan; Qing Zhi Zeng, Shanghai Mental Health Centre, Shanghai Jiao Tong University School of Medicine, Shanghai, China; Yuying Zhang, Department of Medicine and Therapeutics, Prince of Wales Hospital, Chinese University of Hong Kong, Hong Kong SAR, China.
