# Supplementary material for: Accuracy of the Patient Health Questionnaire-9 for screening to detect major depression: updated systematic review and individual participant data meta-analysis
Source: PubMed Central journal article supplement — BMJ. 2021 Oct 5;375:n2183. doi: 10.1136/bmj.n2183 (PMC8491108; doi:10.1136/bmj.n2183), 2021-10-05
Supplement: negz065099.ww3.pdf [file negz065099.ww3.pdf]

## Funding of primary studies

The primary studies by Fiest et al., Patten et al., Amoozegar et al. and Prisie et al. were supported by the Cumming School of Medicine, University of Calgary, and Alberta Health Services through the Calgary Health Trust, as well as the Hotchkiss Brain Institute. Dr Patten was supported by a Senior Health Scholar award from Alberta Innovates Health Solutions. Dr Jetté was supported by a Canada Research Chair in Neurological Health Services Research and an AIHS Population Health Investigator Award. The primary study by Amtmann et al. was supported by a grant from the Department of Education (NIDRR grant number H133B080025) and by the National Multiple Sclerosis Society (MB 0008). Collection of data for the study by Arroll et al. was supported by a project grant from the Health Research Council of New Zealand. Data collection for the study by Ayalon et al. was supported from a grant from Lundbeck International. The primary study by Khamseh et al. was supported by a grant (M-288) from Tehran University of Medical Sciences. The primary studies by Marrie et al. and Bernstein et al. were supported by CIHR (THC-135234) and Crohn's and Colitis Canada. Dr Bernstein was supported in part by the Bingham Chair in Gastroenterology. The primary studies by Bhana et al., Kohrt et al. and Nakku et al. were output of the PRogramme for Improving Mental health carE (PRIME) and were supported by the UK Department for International Development (201446). The views expressed do not necessarily reflect the UK Government's official policies. The primary study by Bombardier et al. was supported by the Department of Education, National Institute on Disability and Rehabilitation Research, Spinal Cord Injury Model Systems: University of Washington (grant no. H133N060033), Baylor College of Medicine (grant no. H133N060003), and University of Michigan (grant no. H133N060032). The primary study by Buji et al. was supported by grants from the UKMMC Fundamental Research Fund (FF-2015-051) and the Fundamental Research Grant Scheme by the Malaysian Ministry of Higher Education (FRGS/2/2014/SKK09/UKM/02/1). Collection of data for the primary study by Kiely et al. was supported by National Health and Medical Research Council (grant number 1002160) and Safe Work Australia. Dr Butterworth was supported by Australian Research Council Future Fellowship FT130101444. Collection of data for the primary study by Zhang et al. was supported by the European Foundation for Study of Diabetes, the Chinese Diabetes Society, Lilly Foundation, Asia Diabetes Foundation and Liao Wun Yuk Diabetes Memorial Fund. The primary study by Chibanda et al. was supported by a grant from Grand Challenges Canada (0087-04). The primary study by Conway et al. was supported by the Institute of Health and Biomedical Innovation at Queensland University of Technology and the Sigma Theta Tau International Honour Society of Nursing (ID: 8580). Dr Conwell received support from NIMH (R24MH071604) and the Centers for Disease Control and Prevention (R49 CE002093). The primary study by Grool et al. was supported by a programme grant from The Netherlands Heart Foundation (2007B027). The primary study by Zuithoff et al. was supported by The European Commission (PREDICTQL4-CT2002-00683) and The Netherlands Organisation for Scientific Research (ZonMw 016.046.360). Collection of data for the primary study by Delgadillo et al. was supported by grant from St. Anne's Community Services, Leeds, United Kingdom. The primary study by Martin-Subero et al. was supported in part by a grant from the Spanish Ministry of Health's Health Research Fund (Fondo de Investigaciones Sanitarias, project 97/1184). Collection of data for the primary study by Fann et al. was supported by grant RO1 HD39415 from the US National Center for Medical Rehabilitation Research. The primary study by Fischer et al. was funded by the German Federal Ministry of Education and Research (01GY1150). The primary study by van Heyningen et al. was supported by the Medical Research Council of

South Africa (415865), Cordaid Netherlands (Project 103/10002 G Sub 7) and the Truworths Community Foundation Trust, South Africa. The primary study by Fisher et al. was supported by grants from the National Health and Medical Research Council (APP1026550), the Australian Government Department of Social Services - Families, Housing, Community Services and Indigenous Affairs, and the Victorian Department of Education and Early Childhood Development. Dr Fisher was supported by a Monash Professorial Fellowship and the Jean Hailes Professorial Fellowship, which is supported by a grant to the Jean Hailes Foundation from the H and L Hecht Trust managed by Perpetual Trustees. The primary study by Baron et al. was supported by the National Income Dynamics Study (NIDS), at the University of Cape Town, South Africa. The NIDS is implemented by the Southern Africa Labour and Development Research Unit, and is funded by the Department of Planning, Monitoring and Evaluation. The funding body was involved in the design of the primary study. Data for the primary study by Gelaye et al. was supported by grant from the NIH (T37 MD001449). Collection of data for the primary study by Gjerdingen et al. was supported by grants from the NIMH (R34 MH072925, K02 MH65919, P30 DK50456). The primary study by Gholizadeh et al. was supported by University of Technology Sydney under UTS Research Reestablishment Grants. The primary study by Green et al. (2018) was supported by a grant from the Duke Global Health Institute (453-0751). The primary study by Eack et al. was funded by the NIMH (R24 MH56858). Collection of data for the primary study by Hobfoll et al. was made possible in part from grants from NIMH (RO1 MH073687) and the Ohio Board of Regents. Dr Hall received support from a grant awarded by the Research and Development Administration Office, University of Macau (MYRG2015-00109-FSS). The primary study by Garabiles et al. was supported by the Macao (SAR) Government, through the University of Macau RSKTO grants: MYRG-2014-111. The primary study by Hantsoo et al. was supported by K23 MH107831-02, Brain and Behaviour Research Foundation NARSAD Young Investigator Award. The primary study by Haroz et al. was supported by the United States Agency for International Development Victims of Torture Fund: AID-DFD A-00-08-00308. Dr Haroz was supported by a NIMH T32 predoctoral training grant (MH014592-38) and postdoctoral training grant (MH103210) during the conduct of primary study. Collection of data provided by Drs. Härter and Reuter was supported by the Federal Ministry of Education and Research (grants No. 01 GD 9802/4 and 01 GD 0101) and by the Federation of German Pension Insurance Institute. The primary study by Henkel et al. was funded by the German Ministry of Research and Education. The primary study by Hides et al. was funded by the Perpetual Trustees, Flora and Frank Leith Charitable Trust, Jack Brockhoff Foundation, Grosvenor Settlement, Sunshine Foundation and Danks Trust. Data for the study by Razykov et al. was collected by the Canadian Scleroderma Research Group, which was funded by the CIHR (FRN 83518), the Scleroderma Society of Canada, the Scleroderma Society of Ontario, the Scleroderma Society of Saskatchewan, Sclérodermie Québec, the Cure Scleroderma Foundation, Inova Diagnostics, Euroimmun, FRQS, the Canadian Arthritis Network, and the Lady Davis Institute of Medical Research of the Jewish General Hospital, Montréal, QC. Dr Hudson was supported by a FRQS Senior Investigator Award. Collection of data for the primary study by Hyphantis et al. (2014) was supported by grant from the National Strategic Reference Framework, European Union, and the Greek Ministry of Education, Lifelong Learning and Religious Affairs (ARISTEIA-ABREVIATE, 1259). The primary study by Paika et al. was supported by the European Economic Area (EEA) Financial Mechanism 2009–2014 (EEA GR07/3767) and National funds as part of the programme “Dissimilarity, Inequality and Social Integration” (132324/I4-25/8/2015). The primary study by Inagaki et al. was supported by the

Ministry of Health, Labour and Welfare, Japan. The primary study by Twist et al. was funded by the UK National Institute for Health Research under its Programme Grants for Applied Research Programme (grant reference number RP-PG-0606-1142). The primary study by Kim et al. was supported by a grant from the Korean Mental Health Technology R&D Project, Ministry of Health and Welfare, Republic of Korea (HM14C2567), an Institute for Information and Communications Technology Promotion grant funded by the Korea government (MSIP) (B0132- 15-1003: the development of skin adhesive patches for the monitoring and prediction of mental disorders), and by the Original Technology Research Programme for Brain Science through the National Research Foundation of Korea (NRF) funded by the Ministry of Education, Science and Technology (NRF-2016M3C7A1947307). The primary study by Janssen et al. was supported by the European Regional Development Fund as part of OP-ZUID; the Province of Limburg; the department of Economic Affairs of the Netherlands (31O.041); Stichting the Weijerhorst, the Pearl String Initiative Diabetes; the Cardiovascular Center Maastricht Cardiovasculair Research Institute Maastricht; School of Nutrition, Toxicology and Metabolism; Stichting Annadal; and Health Foundation Limburg. The primary study by Lamers et al. was funded by the Netherlands Organisation for Health Research and development (grant number 945-03-047). The primary study by Lara et al. was supported by the Consejo Nacional de Ciencia y Tecnología/National Council for Science and Technology (CB-2009-133923-H). The primary study by Liu et al. (2011) was funded by a grant from the National Health Research Institute, Republic of China (NHRI-EX97-9706PI). The primary study by Lotrakul et al. was supported by the Faculty of Medicine, Ramathibodi Hospital, Mahidol University, Bangkok, Thailand (grant number 49086). The primary studies by Osório et al. (2012) were funded by Reitoria de Pesquisa da Universidade de São Paulo (grant number 09.1.01689.17.7) and Banco Santander (grant number 10.1.01232.17.9). Dr Bernd Löwe received research grants from Pfizer, Germany, and from the medical faculty of the University of Heidelberg, Germany (project 121/2000) for the study by Gräfe et al. Dr Marrie was supported by the Waugh Family Chair in Multiple Sclerosis and the Research Manitoba Chair, and CIHR grants, during the conduct of the study. Collection of data for the primary study by Williams et al. was supported by a NIMH grant to Dr Marsh (RO1-MH069666). Dr Marx was supported by the Department of Defence (W81XWH-08-2- 0100/W81XWH-08-2-0102 and W81XWH-12- 2-0117/W81XWH-12-2-0121). The primary study by Mohd Sidik et al. was funded under the Research University Grant Scheme from Universiti Putra Malaysia, Malaysia and the Postgraduate Research Student Support Accounts of the University of Auckland, New Zealand. The primary study by Santos et al. was funded by the National Programme for Centers of Excellence (PRONEX/FAPERGS/CNPq, Brazil). The primary study by Muramatsu et al. (2007) was supported by an educational grant from Pfizer US Pharmaceutical Inc. The primary study by Muramatsu et al. (2018) was supported by grants from Niigata Seiryō University. Dr Osório was supported by Productivity Grants (PQ-CNPq-2 -number 301321/2016-7). Collection of primary data for the study by Pence et al. was provided by NIMH (R34MH084673). The primary study by Persoons et al. was partly funded by a grant from the Belgian Ministry of Public Health and Social Affairs and supported by a limited grant from Pfizer Belgium. The primary study by Picardi et al. was supported by funds for current research from the Italian Ministry of Health. The primary study by Wagner et al. was supported by grants U10CA21661, U10CA180868, U10CA180822, and U10CA37422 from the National Cancer Institute. The study was also funded in part by a grant from the Pennsylvania Department of Health. The department specifically disclaims responsibility for any analyses, interpretations, or conclusions of the primary study. The primary study by Rancans et al. was supported by The

National Research Programme BIOMEDICINE 2014–2017 (5.8.1.). The primary study by Rooney et al. was funded by the United Kingdom National Health Service Lothian Neuro-Oncology Endowment Fund. Dr Shaaban was supported by funding from Universiti Sains Malaysia. The primary study by Shinn et al. was supported by grant NCI K07 CA 093512 and the Lance Armstrong Foundation. The primary study by Sidebottom et al. was funded by a grant from the United States Department of Health and Human Services, Health Resources and Services Administration (grant number R40MC07840). Simning et al.'s research was supported in part by grants from the NIH (T32 GM07356), Agency for Healthcare Research and Quality (R36 HS018246), NIMH (R24 MH071604), and the National Center for Research Resources (TL1 RR024135). The primary study by Spangenberg et al. was supported by a junior research grant from the medical faculty, University of Leipzig. Dr Stafford received PhD scholarship funding from the University of Melbourne. Dr Tran was supported by a Monash Bridging Postdoctoral Fellowship. Collection of data for the studies by Turner et al. (2012) were funded by a bequest from Jennie Thomas through the Hunter Medical Research Institute. The study by van Steenberg-Weijnenburg et al. was funded by Innovatiefonds Zorgverzekeraars. The primary study by Volker et al. was supported by The Netherlands organisation for Health Research and Development (ZonMw) and from Achmea SZ, a Dutch insurance company. The study by Wittkamp et al. was funded by The Netherlands Organisation for Health Research and Development (ZonMw) Mental Health Programme (nos. 100.003.005 and 100.002.021) and the Academic Medical Center/University of Amsterdam. Dr Vöhringer was supported by the Fund for Innovation and Competitiveness of the Chilean Ministry of Economy, Development and Tourism, through the Millennium Scientific Initiative (grant number IS130005). The primary study by Liu et al. (2015) was supported by CIHR (MOP-114970). The primary study by Wang et al. was supported by grants from the Shanghai Health Bureau (Grant number XBR2011015) and from the Ministry of Science and Technology project (2009BAI77B08, 2012BAI01B07). The primary study by Thombs et al. was done with data from the Heart and Soul Study. The Heart and Soul Study was funded by the Department of Veterans Epidemiology Merit Review Programme, the Department of Veterans Affairs Health Services Research and Development service, the National Heart Lung and Blood Institute (R01 HL079235), the American Federation for Ageing Research, the Robert Wood Johnson Foundation, and the Ischemia Research and Education Foundation. The primary study by Liu et al. (2016) was supported by Shanghai Municipal Health and Family Planning Commission Bureau-level Project - Preliminary Exploration of Depression Risk Prediction Model for Outpatients in General Hospitals (Project No. 2010105). No other authors reported funding for primary studies or for their work on this study.
